# Supplementary material for: Prediction of mortality in adult patients with severe acute lung failure receiving veno-venous extracorporeal membrane oxygenation: a prospective observational study
Source: PubMed Central journal article supplement (PMC4057201; doi:10.1186/cc13824), 2014-04-09
Supplement: cc13824-S2.pdf [file cc13824-S2.pdf]

## ADDITIONAL FILE 2: Data on external scores

### Calculation of the SOFA score

Table 1: The SOFA score

| SOFA score                                  | 0              | 1       | 2                                    | 3                                               | 4                                               |
|---------------------------------------------|----------------|---------|--------------------------------------|-------------------------------------------------|-------------------------------------------------|
| <b>Respiration</b>                          |                |         |                                      |                                                 |                                                 |
| PaO <sub>2</sub> /FIO <sub>2</sub> (mm Hg)  | >400           | <400    | <300                                 | <200 <sup>a</sup>                               | <100 <sup>a</sup>                               |
| <b>Coagulation</b>                          |                |         |                                      |                                                 |                                                 |
| Platelets x10 <sup>3</sup> /mm <sup>3</sup> | >150           | <150    | <100                                 | <50                                             | <20                                             |
| <b>Liver</b>                                |                |         |                                      |                                                 |                                                 |
| Bilirubin (mg/dL)                           | <1.2           | 1.2-1.9 | 2.0-5.9                              | 6.-11.9                                         | >12.0                                           |
| <b>Cardiovascular<sup>b</sup></b>           | No hypotension | MAP <70 | Dopamine ≤5 or dobutamine (any dose) | Dopamine >5 or norepinephrine /epinephrine ≤0.1 | Dopamine >15 or norepinephrine/epinephrine >0.1 |
| <b>CNS<sup>c</sup></b>                      |                |         |                                      |                                                 |                                                 |
| Glasgow Coma Score                          | 15             | 13-14   | 10-12                                | 6-9                                             | <6                                              |
| <b>Renal</b>                                |                |         |                                      |                                                 |                                                 |
| Creatinine (mg/dL) or urine output (mL/day) | <1.2           | 1.2-1.9 | 2.0-3.4                              | 3.5-4.9 or <500                                 | >5.0 or <200                                    |

MAP mean arterial pressure, CNS central nervous system.

<sup>a</sup>with respiratory support

<sup>b</sup>vasoactive mediations administered for at least 1 hr (doses are given in ug/kg/min)

<sup>c</sup>as we do not know the "real" Glasgow Coma Scale in intubated patients, the Glasgow Coma Scale was set to 15 (=SOFA score 0) for all patients.

*Reprinted with kind permission from Springer Science+Business Media: Intensive care medicine, The SOFA (Sepsis-related Organ Failure Assessment) score to describe organ dysfunction/failure. On behalf of the Working Group on Sepsis-Related Problems of the European Society of Intensive Care Medicine, Vol. 22, 1996, pp. 707-710, Vincent JL, Moreno R, Takala J, Willatts S, De Mendonca A, Bruining H, Reinhart CK, Suter PM, Thijs LG, Table 3.*

### Calculation of the ECMOnet score

In accordance with the original manuscript, the ECMOnet score for each individual was calculated with the following formula where  $ps_i$  is the partial score assigned to each of the 5 parameters as given in Table 2:

$$ECMOnet\ score = \left( \sum_{i=1}^5 ps_i \right) - 1$$

Table 2: The ECMOnet score

| <b>PARAMETER</b>                                | <b>PARTIAL SCORE (<math>ps_i</math>)</b> |
|-------------------------------------------------|------------------------------------------|
| <i>1) PreECMO hospital length of stay, days</i> |                                          |
| ≤ 3                                             | 0.5                                      |
| 4 - 7                                           | 1                                        |
| 8 - 11                                          | 1.5                                      |
| > 11                                            | 2                                        |
| <i>2) Bilirubin, mg/dl</i>                      |                                          |
| ≤ 0.15                                          | 0                                        |
| 0.16 - 0.65                                     | 0.5                                      |
| 0.66 - 1.15                                     | 1                                        |
| 1.16 - 1.65                                     | 1.5                                      |
| 1.66 - 2.15                                     | 2                                        |
| > 2.15                                          | 2.5                                      |
| <i>3) Creatinine, mg/dl</i>                     |                                          |
| ≤ 0.5                                           | 0                                        |
| 0.51 - 0.80                                     | 0.5                                      |
| 0.81 - 1.10                                     | 1                                        |
| 1.11 - 1.40                                     | 1.5                                      |
| 1.41 - 1.70                                     | 2                                        |
| 1.71 - 2.00                                     | 2.5                                      |
| 2.01 - 2.30                                     | 3                                        |
| > 2.30                                          | 3.5                                      |
| <i>4) Hematocrit, %</i>                         |                                          |
| > 40                                            | 0.5                                      |
| 36 - 40                                         | 1                                        |
| 31 - 35                                         | 1.5                                      |
| ≤ 30                                            | 2.0                                      |
| <i>5) Mean arterial pressure, mmHg</i>          |                                          |
| > 90                                            | 0                                        |
| 61 - 90                                         | 0.5                                      |
| ≤ 60                                            | 1                                        |

ECMO extracorporeal membrane oxygenation

Reprinted with kind permission from Springer Science+Business Media: *Intensive care medicine, Predicting mortality risk in patients undergoing venovenous ECMO for ARDS due to influenza A (H1N1) pneumonia: the ECMOnet score*, Vol. 39, 2013, pp. 275-281, Pappalardo F, Pieri M, Greco T, Patroniti N, Pesenti A, Arcadipane A, Ranieri VM, Gattinoni L, Landoni G, Holzgraefe B, Beutel G, Zangrillo A, *Italian ECMOnet, Table 2.*

#### Calculation of the PRESERVE score

Table 3: The PRESERVE score calculated with parameters available at the time of decision to initiate ECMO

| Parameter                                | Score |
|------------------------------------------|-------|
| Age (years)                              |       |
| <45                                      | 0     |
| 45–55                                    | 2     |
| >55                                      | 3     |
| Body mass index >30                      | -2    |
| Immunocompromised                        | 2     |
| SOFA >12 <sup>a</sup>                    | 1     |
| MV >6 days                               | 1     |
| No prone positioning before ECMO         | 1     |
| PEEP < 10 cm H <sub>2</sub> O            | 2     |
| Plateau pressure >30 cm H <sub>2</sub> O | 2     |
| Total score <sup>c</sup>                 | 0–12  |

ECMO extracorporeal membrane oxygenation, ICU intensive care unit, MV mechanical ventilation, PEEP positive end-expiratory pressure, PRESERVE PRedicting dEath for SEvere ARDS on VV-ECMO, SAPS II simplified acute physiology score, SOFA sepsis-related organ failure assessment

<sup>a</sup>Immunocompromised status included hematological malignancies, solid tumors, solid organ transplantation, high-dose or long-term corticosteroid and/or immunosuppressant use, or human immunodeficiency virus infection

<sup>b</sup>SOFA score was preferred over SAPS II (excluding the age component) for simpler use of the score at the bedside

<sup>c</sup>Higher score indicates higher probability of death by 6 months post-ICU discharge; PRESERVE scores -1 and -2 converted to 0 for simplification

Reprinted with kind permission from Springer Science+Business Media: *Intensive care medicine, The PRESERVE mortality risk score and analysis of long-term outcomes after extracorporeal membrane oxygenation for severe acute respiratory distress syndrome*, Vol. 39, 2013, pp. 1704-1713, Schmidt M, Zogheib E, Roze H, Repesse X, Lebreton G, Luyt CE, Trouillet JL, Brechot N, Nieszkowska A, Dupont H, Ouattara A, Leprince P, Chastre J, Combes A, *Table 4.*
