# Supplementary material for: Prediction of mortality in adult patients with severe acute lung failure receiving veno-venous extracorporeal membrane oxygenation: a prospective observational study
Source: PubMed Central journal article supplement (PMC4057201; doi:10.1186/cc13824), 2014-04-09
Supplement: cc13824-S4.pdf [file cc13824-S4.pdf]

**ADDITIONAL FILE 4: Comparison of survivors and non-survivors**

| <b>Baseline clinical characteristics</b>                | <b>Non-survivors<br/>(n=117)</b> | <b>Survival to discharge<br/>(n=187)</b> | <b>P-value</b> |
|---------------------------------------------------------|----------------------------------|------------------------------------------|----------------|
| Age (years)                                             | 54 (50-57)                       | 46 (43-48)                               | <0.001         |
| Female gender                                           | 36 (30.8%)                       | 64 (34.2%)                               | 0.53           |
| Body mass index (kg/m <sup>2</sup> )                    | 28.8 (27.6-30.2)                 | 28.8 (27.8-29.9)                         | 0.94           |
| Immunocompromised state <sup>1</sup>                    | 37 (31.6%)                       | 26 (13.9%)                               | <0.001         |
| Lung injury score                                       | 3.5 (3.4-3.5)                    | 3.5 (3.4-3.5)                            | 0.90           |
| Sequential organ failure assessment score               | 13 (12-14)                       | 11 (11-12)                               | 0.001          |
| Continuous veno-venous haemofiltration pre-ECMO         | 45 (38.5%)                       | 36 (19.3%)                               | <0.001         |
| Classification of acute lunge injury <sup>2</sup>       |                                  |                                          | 0.022          |
| – Group 1: Pulmonary                                    | 56 (47.9%)                       | 107 (57.2%)                              |                |
| – Group 2: Extra-pulmonary                              | 36 (30.8%)                       | 36 (19.3%)                               |                |
| – Group 3: Trauma                                       | 10 (8.6%)                        | 29 (15.5%)                               |                |
| – Group 4: Others                                       | 15 (12.8%)                       | 15 (8.0%)                                |                |
| Norepinephrine infusion (µg/min/kg)                     | 0.37 (0.29-0.46)                 | 0.33 (0.29-0.39)                         | 0.63           |
| Pre-ECMO duration (days)                                |                                  |                                          |                |
| – Hospitalization                                       | 10 (8-12)                        | 5 (4-7)                                  | 0.023          |
| – Mechanical ventilation                                | 5 (3-7)                          | 2 (2-3)                                  | 0.013          |
| <b>Baseline cardiorespiratory parameters</b>            |                                  |                                          |                |
| Mean arterial pressure (mm Hg)                          | 71 (68-73)                       | 69 (67-71)                               | 0.28           |
| Minute ventilation (L/min)                              | 11.2 (10.6-12.0)                 | 10.4 (10.0-10.9)                         | 0.038          |
| Tidal volume (mL)                                       | 479 (452-503)                    | 480 (459-502)                            | 0.93           |
| Static compliance (mL/cm H <sub>2</sub> O) <sup>3</sup> | 27.1 (24.9-29.6)                 | 27.2 (25.6-28.8)                         | 0.85           |
| Corrected expiratory volume (L/min) <sup>4</sup>        | 18.1 (16.7-19.5)                 | 17.2 (16.1-18.4)                         | 0.41           |
| Positive end-expiratory pressure (cm H <sub>2</sub> O)  | 17 (16-18)                       | 16 (16-17)                               | 0.40           |
| Mean airway pressure (cm H <sub>2</sub> O)              | 23 (22-24)                       | 23 (22-24)                               | 0.82           |
| Peak inspiratory pressure (cm H <sub>2</sub> O)         | 36 (35-37)                       | 35 (34-36)                               | 0.24           |
| Arterial blood gas analysis                             |                                  |                                          |                |
| – FiO <sub>2</sub> (%)                                  | 100 (98-100)                     | 100 (100-100)                            | 0.51           |
| – PaO <sub>2</sub> /FiO <sub>2</sub> (mm Hg)            | 67 (62-73)                       | 69 (65-74)                               | 0.55           |
| – SaO <sub>2</sub> (% saturation)                       | 88 (85-90)                       | 89 (87-90)                               | 0.89           |
| – PaCO <sub>2</sub> (mm Hg)                             | 65 (61-69)                       | 68 (64-72)                               | 0.30           |

|                                                                      |                   |                   |        |
|----------------------------------------------------------------------|-------------------|-------------------|--------|
| - pH                                                                 | 7.24 (7.21-7.27)  | 7.22 (7.22-7.25)  | 0.37   |
| - Base excess (mmol/L)                                               | -1.3 (-2.7-0.3)   | -1.2 (-2.1- -0.1) | 0.88   |
| <b>Baseline laboratory parameters</b>                                |                   |                   |        |
| C-reactive protein (mg/L)                                            | 150 (127-170)     | 163 (140-182)     | 0.36   |
| Lactate (mmol/L)                                                     | 38 (30-47)        | 23 (20-27)        | 0.002  |
| Lactate dehydrogenase (U/L)                                          | 510 (446-608)     | 452 (408-499)     | 0.076  |
| Creatinine (mg/dL)                                                   | 1.4 (1.2-1.6)     | 1.4 (1.2-1.6)     | 0.96   |
| Creatinine clearance (mL/min) <sup>5</sup>                           | 89.2 (79.6-100.1) | 99.8 (89.2-110.6) | 0.38   |
| Bilirubin (mg/dL)                                                    | 1.2 (0.9-1.6)     | 0.9 (0.8-1.1)     | 0.060  |
| ASAT (U/L)                                                           | 122 (96-159)      | 78 (65-96)        | 0.005  |
| Fibrinogen (mg/dL)                                                   | 523 (471-579)     | 562 (521-606)     | 0.24   |
| Leukocytes (/μL)                                                     | 12.8 (11.1-14.7)  | 14.1 (12.8-15.5)  | 0.20   |
| Haemoglobin (g/dL)                                                   | 9.8 (9.4-10.3)    | 10.9 (10.5-11.3)  | <0.001 |
| Platelets (x10 <sup>9</sup> /L)                                      | 171 (147-195)     | 185 (167-205)     | 0.23   |
| International normalized ratio                                       | 1.30 (1.24-1.38)  | 1.23 (1.19-1.28)  | 0.17   |
| Prothrombin time (sec)                                               | 50 (46-55)        | 48 (45-51)        | 0.21   |
| D-dimer (mg/L)                                                       | 11 (9-14)         | 8 (7-10)          | 0.022  |
| <b>Procedural characteristics of ECMO treatment</b>                  |                   |                   |        |
| Transport-ECMO (no/yes)                                              | 34 (29.1%)        | 99 (52.9%)        | <0.001 |
| ECMO duration (days)                                                 | 11 (9-13)         | 10 (9-11)         | 0.60   |
| Red cell transfusions (~320 mL) per patient                          | 8 (6-9)           | 3 (3-4)           | <0.001 |
| Plasma transfusions (~250 mL) per patient                            | 3 (2-5)           | 0 (0-1)           | 0.001  |
| Platelet transfusions (~270 mL) per patient                          | 1 (0-1)           | 0 (0-0)           | <0.001 |
| Continuous veno-venous haemofiltration during ECMO                   | 25 (21.4%)        | 34 (18.2%)        | 0.49   |
| <b>Laboratory and cardiorespiratory status the first day on ECMO</b> |                   |                   |        |
| Venous oxygen saturation (%)                                         | 70 (68-72)        | 70 (69-72)        | 0.57   |
| Minute ventilation (L/min)                                           | 5 (5-6)           | 4 (4-5)           | 0.011  |
| Tidal volume (mL)                                                    | 305 (278-332)     | 278 (262-294)     | 0.097  |
| Blood flow on ECMO (L/min)                                           | 2.8 (2.7-3.0)     | 2.8 (2.7-2.9)     | 0.89   |
| Norepinephrine infusion (μg/min/kg)                                  | 0.18 (0.13-0.25)  | 0.12 (0.09-0.14)  | 0.041  |
| <b>Blood gas analysis</b>                                            |                   |                   |        |
| - FiO <sub>2</sub> (%)                                               | 65 (60-68)        | 55 (52-58)        | <0.001 |
| - PaO <sub>2</sub> /FiO <sub>2</sub> (mm Hg)                         | 122 (112-133)     | 146 (137-155)     | <0.001 |
| - Arterial pH                                                        | 7.43 (7.41-7.45)  | 7.44 (7.43-7.46)  | 0.14   |
| - Arterial PaCO <sub>2</sub> (mm Hg)                                 | 37 (36-39)        | 38 (37-39)        | 0.77   |

|                                                              |                  |                  |        |
|--------------------------------------------------------------|------------------|------------------|--------|
| Laboratory parameters                                        |                  |                  |        |
| – C-reactive protein (mg/L)                                  | 162 (143-180)    | 214 (196-231)    | <0.001 |
| – Lactate (mmol/L)                                           | 36 (27-47)       | 24 (21-28)       | 0.002  |
| – Lactate dehydrogenase (U/L)                                | 584 (502-717)    | 511 (462-573)    | 0.054  |
| – Creatinine (mg/dL)                                         | 1.3 (1.0-1.8)    | 1.1 (1.0-1.2)    | 0.21   |
| – Bilirubin (mg/dL)                                          | 1.9 (1.5-2.3)    | 1.1 (1.0-1.3)    | 0.015  |
| – International normalized ratio                             | 1.38 (1.32-1.48) | 1.27 (1.24-1.31) | 0.002  |
| <b>Laboratory and cardiorespiratory analysis during ECMO</b> |                  |                  |        |
| Minimum arterial pH <7.20                                    | 23 (19.8%)       | 6 (3.2%)         | <0.001 |
| Maximum arterial pH >7.55                                    | 24 (20.5%)       | 51 (27.3%)       | 0.18   |
| Minimum lactate (mmol/L)                                     | 15 (12-22)       | 7 (6-7)          | <0.001 |
| Maximum lactate (mmol/L)                                     | 87 (70-103)      | 39 (34-46)       | <0.001 |
| Minimum PaCO <sub>2</sub> (mm Hg)                            | 30 (29-31)       | 30 (30-31)       | 0.55   |
| Maximum PaCO <sub>2</sub> (mm Hg)                            | 48 (46-50)       | 51 (50-52)       | 0.001  |
| Maximum blood flow on ECMO (L/min)                           | 3.1 (3.0-3.2)    | 3.3 (3.1-3.4)    | 0.001  |
| Minimum PaO <sub>2</sub> /FiO <sub>2</sub> (mm Hg)           | 76 (71-81)       | 101 (95-106)     | <0.001 |
| C-reactive protein at end of ECMO (mg/dL)                    | 137 (105-173)    | 88 (76-101)      | 0.007  |

Continuous variables are shown as median (95% confidence interval), categorical variables as *n* (%).

ALAT: alanine aminotransferase; ASAT: aspartate aminotransferase; CVVHF: continuous veno-venous hemofiltration; ECMO: extracorporeal membrane oxygenation; FiO<sub>2</sub>: fraction of inspired oxygen; LIS: lung injury score; PaCO<sub>2</sub>: partial arterial pressure of carbon dioxide; PaO<sub>2</sub>/FiO<sub>2</sub>: ratio of partial arterial oxygen pressure/fraction of inspired oxygen; SOFA: sequential organ failure assessment

<sup>1</sup>Immunocompromised state included haematological malignancies, solid tumours, solid organ transplantation, high-dose or long-term corticosteroid or other immunosuppressive therapy or human immunodeficiency virus infection.

<sup>2</sup>Group 1: Primary lung failure, including bacterial, viral, fungal or aspiration pneumonia; group 2: Extra-pulmonary sepsis with secondary lung injury; group 3: Multiple trauma with ARDS; group 4: Other pathologies, including near drowning, chronic lung diseases such as lung fibrosis and lung transplantation.

<sup>3</sup>Static compliance of the respiratory system was calculated as tidal volume (mL) divided by difference between peak inspiratory pressure (cm H<sub>2</sub>O) and positive end-expiratory pressure (cm H<sub>2</sub>O).

<sup>4</sup>The corrected expiratory volume per minute was calculated as the measured minute ventilation (L/min) multiplied by the arterial partial pressure of carbon dioxide (mm Hg) divided by 40 mm Hg.

<sup>5</sup>Creatinine clearance was calculated based on formula from Cockcroft and Gault [1].

#### References:

1. Cockcroft DW, Gault MH: **Prediction of creatinine clearance from serum creatinine.** *Nephron* 1976, **16**(1):31-41.
